# Supplementary material for: Pembrolizumab Plus Concurrent Chemoradiation Therapy in Patients With Unresectable, Locally Advanced, Stage III Non–Small Cell Lung Cancer: The Phase 2 KEYNOTE-799 Nonrandomized Trial
Source: PubMed Central journal article supplement — JAMA Oncol. 2021 Jun 4;7(9):1–9. doi: 10.1001/jamaoncol.2021.2301 (PMC8446818; doi:10.1001/jamaoncol.2021.2301), 2021-06-04

## Supplemental Online Content

Jabbour SK, Lee KH, Frost N, et al. Pembrolizumab plus concurrent chemoradiation therapy in patients with unresectable, locally advanced, stage III non–small cell lung cancer: the phase 2 KEYNOTE-799 nonrandomized trial. *JAMA Oncol*. Published online June 4, 2021. doi:10.1001/jamaoncol.2021.2301

**eMethods.** Additional thoracic radiotherapy details.

**eTable 1.** Subgroup analyses of objective response per blinded independent central review per RECIST version 1.1 in all patients as-treated.

**eTable 2.** Summary of radiotherapy dose specification in patients who experienced grade 3–5 pneumonitis (all of whom received radiotherapy).

**eFigure.** Kaplan-Meier estimates of overall survival in (A) cohort A and (B) cohort B and progression-free survival in (C) cohort A and (D) cohort B.

This supplemental material has been provided by the authors to give readers additional information about their work.

## eMethods. Additional thoracic radiotherapy details.

Patients in both cohorts A and B received concurrent thoracic radiotherapy (TRT) using a standardized 3-dimensional conformal radiotherapy (3DCRT) or intensity modulated radiation therapy (IMRT) technique on a linear accelerator operating at beam energy of  $\geq 6$  MV. While 6 MV photons were preferred, 10 MV photons were also permitted. Use of photon energies  $>10$  MV was allowed but discouraged. The target total dose of TRT was 60 Gy in 30 daily fractions of 2 Gy, to the planning target volume (PTV), as detailed in the study protocol section 8.1.9.2 (online-only supplement). Proton treatment was not allowed. The treatment plan was normalized such that 95% of the prescription dose covered  $\geq 99\%$  of the PTV ( $V_{57} >99\%$ ). All radiation doses were calculated with inhomogeneity corrections that took into account the density differences within the irradiated volume (that is, air in the lung and bone). No more than 0.03 cc of the PTV received  $>120\%$  of the prescription dose (maximum dose constraint). A summary of protocol constraints and compliance criteria is provided below. This study required a pretreatment review of the treatment plan for each patient that was evaluated by the central vendor, QARC (who performed a posttreatment review also).

**Table. Summary of protocol constraints and compliance criteria for thoracic radiotherapy**

| Structure         | Metric                 | Per protocol                               | Variation acceptable                                | Deviation acceptable                             |
|-------------------|------------------------|--------------------------------------------|-----------------------------------------------------|--------------------------------------------------|
| PTV               | V60Gy                  | $\geq 95\%$                                | $\geq 90\%$                                         | $< 90\%$                                         |
|                   | Minimum dose (D99%)    | $\geq 55.8$ Gy (93%)<br>$\geq 57$ Gy (95%) | $\geq 54$ Gy (90%)                                  | $< 54$ Gy                                        |
|                   | Maximum dose (0.03 cc) | $\leq 72$ Gy (120%)                        | $\leq 75$ Gy (125%)                                 | $> 75$ Gy                                        |
| Spinal cord       | Maximum dose (0.03 cc) | $\leq 50.0$ Gy                             | $\leq 52$ Gy                                        | $> 52$ Gy                                        |
| Lungs (minus GTV) | V20Gy                  | $\leq 31\%$                                | None                                                | $> 31$                                           |
|                   | V5Gy                   | $\leq 60\%$                                | $\leq 65\%$                                         | $> 65\%$                                         |
|                   | Mean dose              | $\leq 20$ Gy                               | $\leq 22$ Gy                                        | $> 22$ Gy                                        |
| Heart             | Mean dose              | $\leq 20$ Gy                               | $\leq 26$ Gy                                        | $> 26$ Gy                                        |
| Esophagus         | Maximum dose (0.03 cc) | $\leq 63$ Gy                               | $\leq 66$ Gy                                        | $> 66$ Gy                                        |
|                   | Mean dose              | $\leq 34$ Gy                               | $\leq 35$ Gy                                        | $> 35$ Gy                                        |
|                   | V60Gy                  | Not circumferential                        | Circumferential for $\leq 0.5$ cm contiguous length | Circumferential for $> 0.5$ cm contiguous length |
| Brachial plexus   | Maximum dose (0.03 cc) | $\leq 63$ Gy                               | $\leq 66$ Gy                                        | $> 66$ Gy                                        |

GTV, gross tumor volume; PTV, planning target volume.

The use of 4-dimensional computed tomography (4DCT) scans and 4-dimensional radiation treatment planning was permitted. The PTV could be treated with any combination of coplanar or noncoplanar 3-dimensional conformal fields shaped to deliver the specified dose while restricting the dose to the normal tissues. The use of IMRT was also permitted at institutions that had been credentialed by the central vendor (QARC) for intrathoracic IMRT treatments. For additional TRT-related details, please refer to section 8.1.9.2 of the study protocol (online-only supplement).

**eTable 1.** Subgroup analyses of objective response per blinded independent central review per RECIST version 1.1 in all patients as-treated.

|                             | <b>Cohort A (n=112)</b> | <b>Cohort B (n=102)</b> |
|-----------------------------|-------------------------|-------------------------|
| Overall ORR                 | 79 (70.5)               | 72 (70.6)               |
| Age, years                  |                         |                         |
| <65                         | 37 (75.5)               | 37 (68.5)               |
| ≥65                         | 42 (66.7)               | 35 (72.9)               |
| Gender                      |                         |                         |
| Male                        | 52 (68.4)               | 45 (72.6)               |
| Female                      | 27 (75.0)               | 27 (67.5)               |
| Tumor histology             |                         |                         |
| Squamous                    | 52 (71.2)               | 0 (NA)                  |
| Nonsquamous                 | 27 (69.2)               | 72 (70.6)               |
| ECOG performance status     |                         |                         |
| 0                           | 37 (72.5)               | 40 (70.2)               |
| 1                           | 42 (68.9)               | 32 (71.1)               |
| Disease stage               |                         |                         |
| IIIA                        | 29 (70.7)               | 28 (71.8)               |
| IIIB                        | 46 (73.0)               | 29 (69.0)               |
| Smoking status <sup>a</sup> |                         |                         |
| Former/current smoker       | 75 (70.8)               | 70 (72.2)               |
| PD-L1 status <sup>b</sup>   |                         |                         |
| TPS <1%                     | 14 (66.7)               | 20 (71.4)               |

|               |           |           |
|---------------|-----------|-----------|
| TPS $\geq$ 1% | 50 (75.8) | 29 (72.5) |
|---------------|-----------|-----------|

NA, Not applicable; ORR, objective response rate; RECIST v1.1, Response Evaluation Criteria in Solid Tumors, version 1.1. Values are presented as n (%) unless stated otherwise.

<sup>a</sup>There were only 11 patients in the 'never smoker' subgroup (6 in cohort A, 5 in cohort B) which precluded further analysis.

<sup>b</sup>Patients with PD-L1 not evaluable or unknown are not included in the subgroup analysis.

**eTable 2.** Summary of radiotherapy dose specification in patients who experienced grade 3–5 pneumonitis (all of whom received radiotherapy).

|                           | <b>Cohort A (n=9)</b>  | <b>Cohort B (n=7)</b>  |
|---------------------------|------------------------|------------------------|
| Actual total lung V20 (%) | n=8                    | n=6                    |
| Mean (SD)                 | 27.3 (4.13)            | 24.8 (5.74)            |
| Median (range)            | 27.0 (22.0–34.0)       | 25.0 (17.0–32.0)       |
| ≤31%, n (%)               | 6 (75.0)               | 5 (83.3)               |
| >31%, n (%)               | 2 (25.0)               | 1 (16.7)               |
| Actual Total Lung V5 (%)  | n=8                    | n=6                    |
| Mean (SD)                 | 57.8 (4.40)            | 55.0 (9.76)            |
| Median (range)            | 59.0 (51.0–63.0)       | 58.5 (36.0–62.0)       |
| ≤60%, n (%)               | 6 (75.0)               | 4 (66.7)               |
| >60%, n (%)               | 2 (25.0)               | 2 (33.3)               |
| Mean Lung Dose (cGy)      | n=8                    | n=6                    |
| Mean (SD)                 | 1525.0 (190.89)        | 1455.0 (276.21)        |
| Median (range)            | 1573.0 (1288.0–1849.0) | 1466.5 (1076.0–1814.0) |
| Mean Heart Dose (cGy)     | n=8                    | n=6                    |
| Mean (SD)                 | 1178.1 (477.81)        | 769.2 (337.56)         |
| Median                    | 1037.0 (644.0–1825.0)  | 838.0 (250.0–1178.0)   |
| Tumor Volume (CC)         | n=8                    | n=6                    |
| Mean (SD)                 | 133.9 (73.50)          | 86.7 (133.61)          |
| Median (range)            | 116.5 (39.0–244.0)     | 31.0 (7.0–353.0)       |

**eFigure.** Kaplan-Meier estimates of overall survival in (A) cohort A and (B) cohort B and progression-free survival in (C) cohort A and (D) cohort B. NR, not reached.

(A)

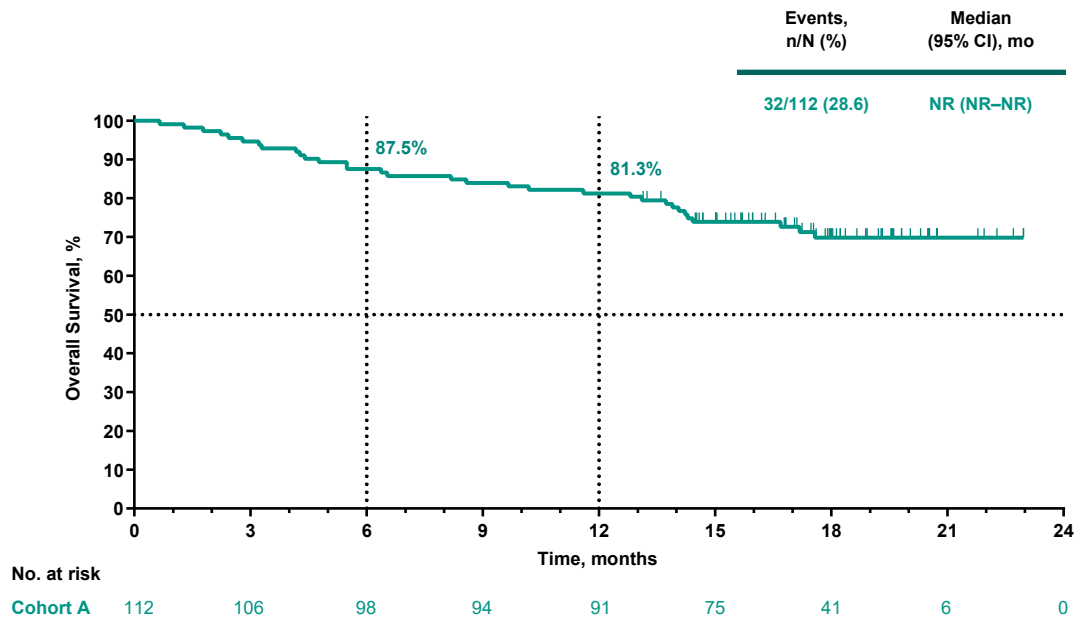

(B)

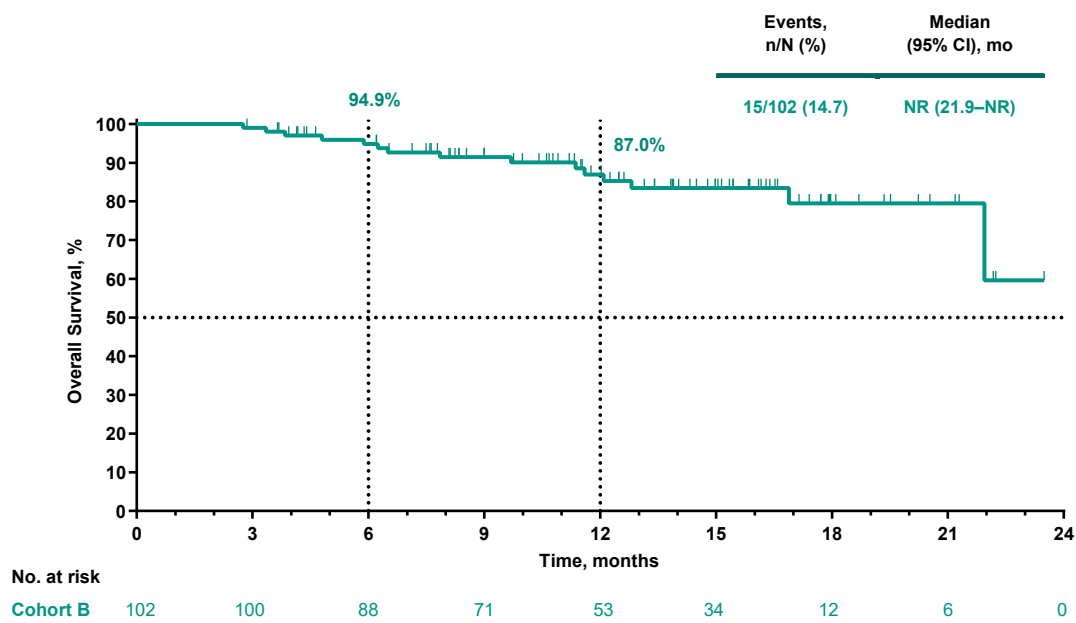

(C)

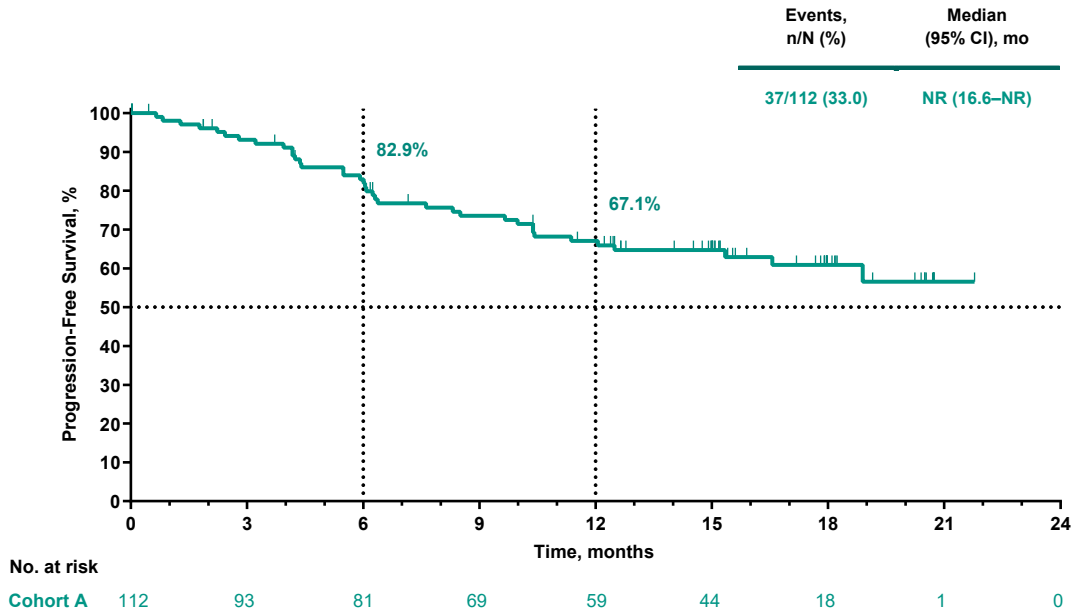

(D)

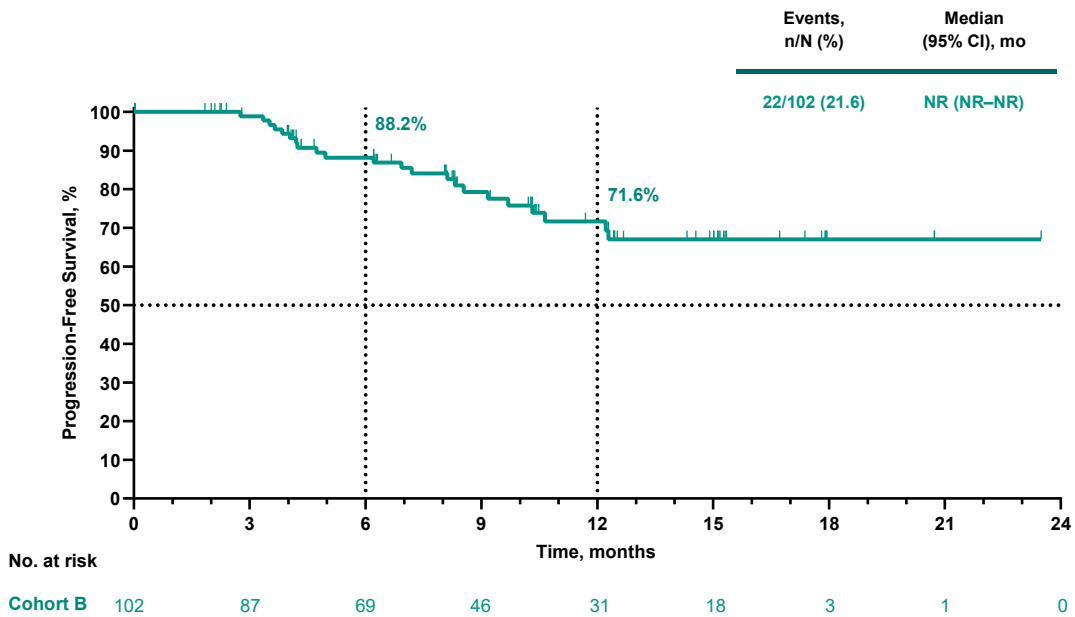

Supplement: jamaoncol-e212301-s002.pdf [file jamaoncol-e212301-s002.pdf]
